# Supplementary material for: Ecological Change, Sliding Baselines and the Importance of Historical Data: Lessons from Combing Observational and Quantitative Data on a Temperate Reef Over 70 Years
Source: PLOS journal article supplement (doi:10.1371/journal.pone.0118581), 2015-02-25
Supplement: S4 (10.1371/journal.pone.0118581.s004) [file journal.pone.0118581.s004]

## Supporting Information

Table S1. Available literature on the coralligenous assemblages of Mesco Reef, with a short synopsis of the most relevant information.

| Year    | References                    | Information type                                               | Main results                                                                                                                                                                                                                                                                                                                                                                                                                                                                   |
|---------|-------------------------------|----------------------------------------------------------------|--------------------------------------------------------------------------------------------------------------------------------------------------------------------------------------------------------------------------------------------------------------------------------------------------------------------------------------------------------------------------------------------------------------------------------------------------------------------------------|
| 1936    | Tortonese and Faraggiana [34] | Naturalistic observations.                                     | Occurrence of <i>Petrosia dura</i> (= <i>P. ficiformis</i> ), <i>Eunicella verrucosa</i> , <i>Paramuricea chamaleon</i> (= <i>P. clavata</i> ) and <i>Retepora cellulosa</i> (= <i>Reteporella grimaldii</i> ).                                                                                                                                                                                                                                                                |
| 1958    | Motta [24]                    | Underwater observations by scuba.                              | Seabed profile to 50 m depth, reef morphology, list of the most conspicuous species.                                                                                                                                                                                                                                                                                                                                                                                           |
| 1958    | Roghi [35]                    | Underwater observations by scuba.                              | Abundance and large size of <i>Gerardia savaglia</i> (= <i>Savalia s.</i> ).                                                                                                                                                                                                                                                                                                                                                                                                   |
| 1959    | Rossi [36]                    | List of species, qualitative information on octocorals.        | Abundance of <i>Eunicella stricta</i> (= <i>E. singularis</i> ) at 20-25 m depth; dominance of <i>Paramuricea chamaleon</i> (= <i>P. clavata</i> ) at around 30 m depth, followed by <i>Leptogorgia sarmentosa</i> , <i>Eunicella verrucosa</i> , <i>Gerardia savaglia</i> (= <i>Savalia s.</i> ), <i>Alcyonium coralloides</i> and <i>Rolandia coralloides</i> .                                                                                                              |
| 1960    | Tortonese [37]                | Naturalistic observations.                                     | Abundance of <i>Eunicella stricta</i> (= <i>E. singularis</i> ) in the 'precoralligenous', and of <i>Paramuricea chamaleon</i> (= <i>P. clavata</i> ) and <i>Alcyonium coralloides</i> in the coralligenous; occurrence of <i>Gerardia savaglia</i> (= <i>Savalia s.</i> ), <i>Eunicella verrucosa</i> , <i>Leptogorgia sarmentosa</i> , <i>Rolandia coralloides</i> , <i>Coenocyathus mouchezii</i> (= <i>Phyllangia americana m.</i> ), and <i>Josephella marenzelleri</i> . |
| 1960    | Roghi [25]                    | Description of the underwater photographic survey methodology. | Abundance of <i>Paramuricea chamaleon</i> (= <i>P. clavata</i> ) and <i>Gerardia savaglia</i> (= <i>Savalia s.</i> ).                                                                                                                                                                                                                                                                                                                                                          |
| 1961    | Rossi [38]                    | Influence of environmental factors on biotic assemblages.      | Fine sedimentation favours the occurrence of <i>Eunicella verrucosa</i> , <i>Alcyonium coralloides</i> , <i>Cellaria fistulosa</i> , <i>Pteria hirundo</i> ; some bryozoans and scleractinian corals are mud-tolerant; presence of sciaphilic species at depths lower than usual due to water turbidity.                                                                                                                                                                       |
| 1961-62 | Rossi [44]                    | Photoquadrats, cover data.                                     | Eight biotic assemblages based on substrate slope and depth; high cover of gorgonacea, mainly <i>Paramuricea chamaleon</i> (= <i>P. clavata</i> ), frequency of <i>Gerardia savaglia</i> (= <i>Savalia s.</i> ).                                                                                                                                                                                                                                                               |
| 1975    | Associazione Parmasub [39]    | Qualitative information, list of species.                      | No apparent pollution; little difference as compared to what previously reported by Rossi.                                                                                                                                                                                                                                                                                                                                                                                     |
| 1978    | Andreoli et al. [40]          | Qualitative information.                                       | Benthic assemblages in good conditions. <i>Paramuricea clavata</i> shallower than usual, sponges and scleractinian corals scarce, richness of bryozoans.                                                                                                                                                                                                                                                                                                                       |
| 1985    | Ardizzone and Belluscio [41]  | ROV (Remotely Operated Vehicle) transects.                     | Short description of the coralligenous habitat as observed on videos. Presence of <i>Paramuricea clavata</i> , <i>Eunicella singularis</i> , <i>E. verrucosa</i> and <i>Lophogorgia sarmentosa</i> (= <i>Leptogorgia s.</i> ).                                                                                                                                                                                                                                                 |
| 1985    | Relini et al. [42]            | Qualitative descriptions.                                      | Absence of <i>Gerardia savaglia</i> (= <i>Savalia s.</i> ) and reduced frequency of <i>Eunicella singularis</i> and <i>Paramuricea clavata</i> , as compared to Rossi's observations; turbid water below 25 m and high sedimentation rate at depth.                                                                                                                                                                                                                            |

|      |                                                        |                                                                                        |                                                                                                                                                                                                                                                                                           |
|------|--------------------------------------------------------|----------------------------------------------------------------------------------------|-------------------------------------------------------------------------------------------------------------------------------------------------------------------------------------------------------------------------------------------------------------------------------------------|
| 1988 | Peirano and Tunesi [46]                                | Photoquadrats, cover data on anthozoans.                                               | Increased cover of <i>Paramuricea clavata</i> and <i>Leptopsammia pruvoti</i> as compared to Rossi's data. <i>L. pruvoti</i> also occurs in shallow waters. <i>Alcyonium coralloides</i> scarce.                                                                                          |
| 1989 | Tunesi et al. [43]                                     | Visual survey, distribution of gorgonians.                                             | Schematic distribution maps of <i>Eunicella singularis</i> , <i>Eunicella verrucosa</i> , <i>Paramuricea clavata</i> and <i>Leptogorgia ceratophyta</i> (= <i>L. sarmentosa</i> ).                                                                                                        |
| 1990 | Peirano and Sassarini [47]                             | Photoquadrats, cover data.                                                             | Dominance of <i>Paramuricea clavata</i> , <i>Parazoanthus axinellae</i> and <i>Leptogorgia sarmentosa</i> .                                                                                                                                                                               |
| 1996 | Salvati [48], Peirano et al. [49], Bianchi et al. [50] | Photoquadrats, cover data.                                                             | Decreased algal cover and increased cover of <i>Parazoanthus axinellae</i> and <i>Leptopsammia pruvoti</i> in shallow water, as compared to Rossi's data, putatively due to increased water turbidity. <i>Alcyonium coralloides</i> and <i>Eunicella singularis</i> not recorded anymore. |
| 2000 | Morri and Bianchi [29]                                 | Comparison of existing information on biotic cover and analysis of environmental data. | Great dissimilarity between biological data of the 1990s and the early 1960s; diminished water transparency between the 1950s and the 1990s; temperature increased between 1959 and 1996, much less so between 1990 and 1996.                                                             |
| 2008 | Roghi [51], Roghi et al. [52]                          | Photoquadrats, cover data.                                                             | Scarcity of massive sponges, change in bushy bryozoan species, and reduced gorgonian cover with respect to previous information; occurrence of the alien algae <i>Womersleyella setacea</i> and <i>Caulerpa racemosa</i> (= <i>C. cylindracea</i> ).                                      |
